# Supplementary material for: High-level Coexpression of JAG1 and NOTCH1 Is Observed in Human Breast Cancer and Is Associated with Poor Overall Survival
Source: Oxford University Press journal article supplement (doi:10.1158/0008-5472.can-05-1069), 2005-09-15
Supplement: can-05-1069v2-suptab1.xls [file can-05-1069v2-suptab1.xls]

## Sheet: Sheet2
Patient	1	2	3	4	6	7	8	9	10	11	12	13	14	15	16	17	18	19	20	21	22	23	24	25	26	28	29	30	31	32	33	34	35	37	38	39	41	42	43	45	46	47	48	49	50	51	52	53	54
Age	80	48	38	56	51	66	75	69	51	65	83	76	53	63	72	62	41	84	59	57	62	71	86	50	72	72	73	46	55	49	62	52	43	64	65	62	45	48	58	65	43	29	50	55	31	65	44	61	43
Tumor(s)	lobular	lobular/duc	NOS	Metaplastic	NOS	NOS	NOS	NOS	NOS	NOS	NST	NST	NOS	NOS	NOS	NOS	NOS	NOS	metaplastic	micropap	NOS	NOS	NOS	NOS	NOS	lobular	lobular	IDC	NOS	NOS	NOS	IDC/ILC	NOS	IDC/ILC	NOS	IDC	IDC	IDC	IDC	NOS	IDC	IDC	IDC	IDC	NOS	NOS	NOS	NOS	IDC
Nodes	0/9	2/19	0/22	0/15	0/5	5/14	0/18	0/4	3/19		0/1	9/19	0/4	0/13	2/10	10/26	5/14	ND	4/22	2/14	0/28	1/11	ND	2/17	10/16	1/12	0/11	2/17	4/25	0/14	2/18	39/40	1/21	8/36	1/10	ND	1/12	0/14	0/20	0/9	20/24	0/5	0/14	0/21	0/18	4/16	4/13	0/1	2/27
Size (cm)	3.2	1.5	2.4	3.2	2.2	1.5	2.5	2	8	1.9	1.7	3	3.8	2	2.7	3.2	2.4	2.7	3.5	1.2	3.5	5	2.8	3.5	3.8	12	14	2.5	4.5	3	2.4	7.5	3	3	3	1.3	1.9	2.7	4	1.8	18	4.2	2.5	2.6	3.5	2.7	1.5	3.5	2.9
Grade	II	III	III	III	III	III	II	I	I	I	I	III	III	II	I	III	III	II	III	III	II	II	III	II	II	I	II	III	III	III	II	III	III	II	III	III	III	III	III	III	III	III	III	II	III	III	III	III	III
ER	+	+	+	-	+	-	+		+	+	+	-	+	-	+	-	-	+	-	+	+	+	-	+	+	+	+	-	-	+	+	+	+	+	+		+	-	+	+	-	-	-	+	-	+	+	-	+
PR	-	+	+	-	-	-	+		-	+	+	-	-	-	+	-	-	+	-	-	+	+	-	+	+	-	+	-	-	-	+	-	-	+	+		-	-	+/-	+	-	-	-	+	-	+	+	-	+
LVI	-	+	-	-	+	-	-	-	+	-	-	+	+	-	-	-	+	-	+	+	+	+	+	-	+	-	+	+	-	+	-	++	-	++	-	-	-	+ rare	-	-	+	+	-	-	-	+	+	-	+
Necrosis	-	-	-	+	-	-	-	-	-	-	-	+	-	-	+	-	+	-	+	-	+	+	+	ND	-	-	-	+	+	+	-	-	+	-	-	-	-	-	-	-	+	+	-	+	+	-	-	+	-
Her-2/neu	-	-	-	-	-	-	-		-	-	-	-	+	+	-	-	-	-	-	-	-	-	-	-	-	-	-	-	+	-	+	-	-	+	-		+	-	-	-	-	-	-	-	FISH -/+	+	-		-
DLL1	1	1	1		2	2		0	0	0	0	0	1	1	0	0	1	1	0	0	0	0	0	0
DLL3	0	0			0	0	0	0	0	0	0	0	1	0	0	1	1	1	0	0	0		0	0	0
DLL4	1	0	1		1	1	0	1	1	1	0	1	1	1	0	1	1	1	0	0	0	0	0
JAG1	1		0		0	2	0	0	2	1	0	2	1	0	1	0	0	1	2	1	1	1	2	0	0	0	0	0	0	0	0	0	2	0	0	0	0	0	0	0	0	1	0	0	0	0	0	0	0
JAG2	0	0	0		0	2	1	1		1	0	1	2	2	1	2	2	2	2	2	2	1	0	0
NOTCH1	0	0	1		1	2	0	0		0	0	1	1	0	0	1	2		1	1	1	1	2	1	2	1		0	0	0	1	0	1	1	0	0	1	0	0	1	2		1	1
NOTCH2	2	1	2		2	2	2	2	2	2	1	2	2	2	2	2	2	2	2	1	2	2	2
NOTCH3	0	0	0	1	0	1	0	1	1	0	0	2	1	1	1	1	0	0	2	0	0	0	2	0	1	1	0	1	1	0	1	0	2	0	0	0	0	0	0	0	0	2	0	0	1	1	0		0
NOTCH4	0	0	0		1	1	1	0		1	1	1	1	1	0	1	2	1	0	0	0	0	0	0
CK5/17			1			1	0		2		0	1	0	3	0	1	2	0	3			0	3	0	0	1	0		0	1		0	2		0	1	1	0	1	1			2		1
[truncated: 2 more columns]
